# Supplementary material for: Cost-effectiveness of adjuvant systemic therapies for patients with high-risk melanoma in Europe: a model-based economic evaluation
Source: PubMed Central journal article supplement (PMC8599106; doi:10.1016/j.esmoop.2021.100303), 2021-11-13

A.

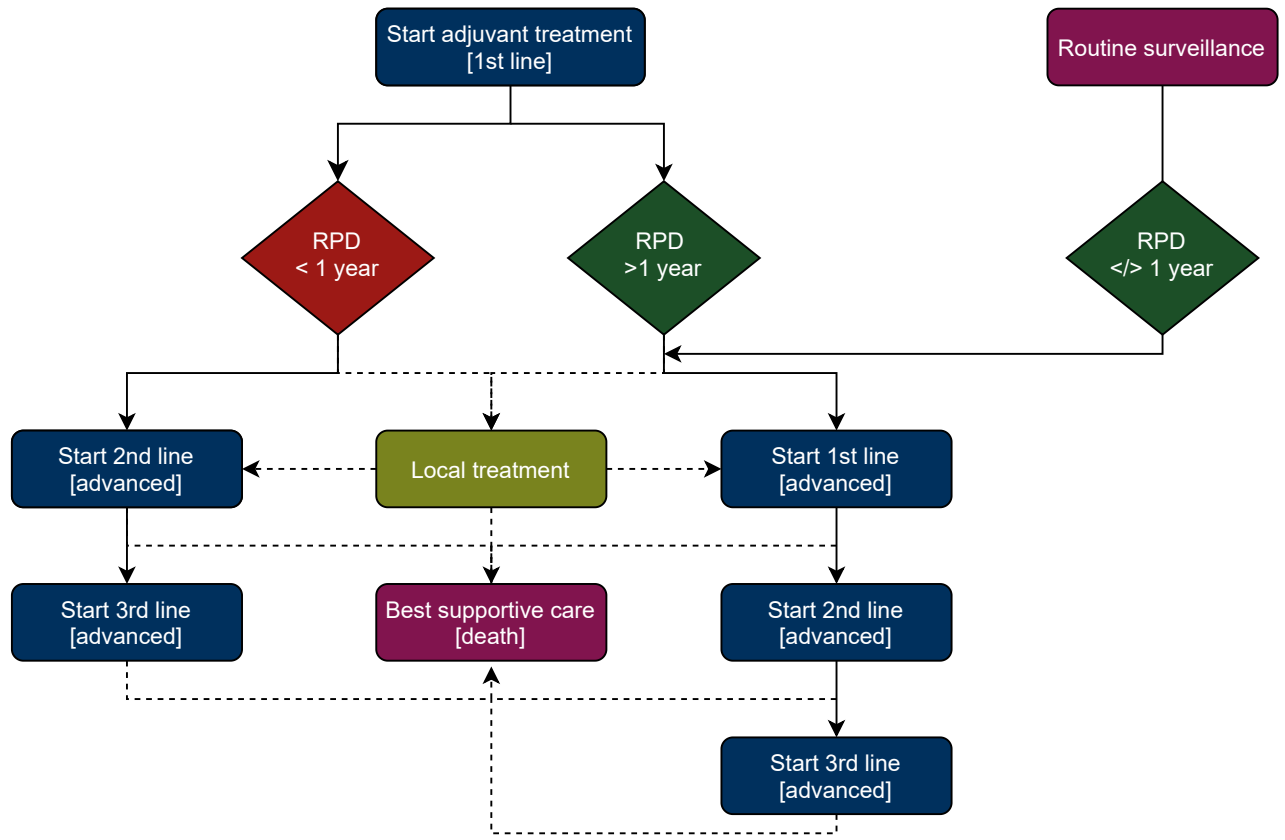

Supplement: mmc2.pdf [file mmc2.pdf]
